# Supplementary material
Source: MDPI journal article supplement (https://www.mdpi.com/2227-7390/12/10/1590)
Supplement: s1 [file s1]

Table S2. Experts KPIs evaluation

[illegible][illegible]

| EXPERT    | FUZZY SCALE |       |       |       |       |       |       |       |       |       |       |       |       |       |       |
|-----------|-------------|-------|-------|-------|-------|-------|-------|-------|-------|-------|-------|-------|-------|-------|-------|
|           | P1          |       |       | P2    |       |       | P3    |       |       | P4    |       |       | P5    |       |       |
| EXPERT 1  | 0,4         | 0,6   | 0,8   | 0,4   | 0,6   | 0,8   | 0,6   | 0,8   | 1     | 0,4   | 0,6   | 0,8   | 0,6   | 0,8   | 1     |
| EXPERT 2  | 0,4         | 0,6   | 0,8   | 0,4   | 0,6   | 0,8   | 0,6   | 0,8   | 1     | 0,4   | 0,6   | 0,8   | 0,6   | 0,8   | 1     |
| EXPERT 3  | 0,6         | 0,8   | 1     | 0,6   | 0,8   | 1     | 0,6   | 0,8   | 1     | 0,6   | 0,8   | 1     | 0,6   | 0,8   | 1     |
| EXPERT 4  | 0,6         | 0,8   | 1     | 0,4   | 0,6   | 0,8   | 0,6   | 0,8   | 1     | 0,6   | 0,8   | 1     | 0,4   | 0,6   | 0,8   |
| EXPERT 5  | 0,6         | 0,8   | 1     | 0,6   | 0,8   | 1     | 0,6   | 0,8   | 1     | 0,4   | 0,6   | 0,8   | 0,4   | 0,6   | 0,8   |
| EXPERT 6  | 0,4         | 0,6   | 0,8   | 0,4   | 0,6   | 0,8   | 0,4   | 0,6   | 0,8   | 0,4   | 0,6   | 0,8   | 0,4   | 0,6   | 0,8   |
| EXPERT 7  | 0,4         | 0,6   | 0,8   | 0,4   | 0,6   | 0,8   | 0,6   | 0,8   | 1     | 0,6   | 0,8   | 1     | 0,2   | 0,4   | 0,6   |
| EXPERT 8  | 0,6         | 0,8   | 1     | 0,6   | 0,8   | 1     | 0,6   | 0,8   | 1     | 0,4   | 0,6   | 0,8   | 0,6   | 0,8   | 1     |
| EXPERT 9  | 0,6         | 0,8   | 1     | 0,4   | 0,6   | 0,8   | 0,6   | 0,8   | 1     | 0,6   | 0,8   | 1     | 0,4   | 0,6   | 0,8   |
| EXPERT 10 | 0,6         | 0,8   | 1     | 0,4   | 0,6   | 0,8   | 0,6   | 0,8   | 1     | 0,4   | 0,6   | 0,8   | 0,4   | 0,6   | 0,8   |
| EXPERT 11 | 0,4         | 0,6   | 0,8   | 0,4   | 0,6   | 0,8   | 0,6   | 0,8   | 1     | 0,4   | 0,6   | 0,8   | 0,2   | 0,4   | 0,6   |
| EXPERT 12 | 0,6         | 0,8   | 1     | 0,6   | 0,8   | 1     | 0,4   | 0,6   | 0,8   | 0,4   | 0,6   | 0,8   | 0,4   | 0,6   | 0,8   |
| EXPERT 13 | 0,4         | 0,6   | 0,8   | 0,6   | 0,8   | 1     | 0,4   | 0,6   | 0,8   | 0,4   | 0,6   | 0,8   | 0,2   | 0,4   | 0,6   |
| EXPERT 14 | 0,4         | 0,6   | 0,8   | 0,4   | 0,6   | 0,8   | 0,6   | 0,8   | 1     | 0,6   | 0,8   | 1     | 0,4   | 0,6   | 0,8   |
|           | 0,500       | 0,700 | 0,900 | 0,471 | 0,671 | 0,871 | 0,557 | 0,757 | 0,957 | 0,471 | 0,671 | 0,871 | 0,414 | 0,614 | 0,814 |
|           | m1          | m2    | m3    | m1    | m2    | m3    | m1    | m2    | m3    | m1    | m2    | m3    | m1    | m2    | m3    |

[illegible]

[illegible][illegible]
