# Supplementary material
Source: MDPI journal article supplement (https://www.mdpi.com/2227-7390/12/10/1590)
Supplement: s1 [file s1]

Table S4. Expert evaluation of dimensions and KPIs

|   |    | C           | S           | P           | D         | F           | G           |
|---|----|-------------|-------------|-------------|-----------|-------------|-------------|
| C | E1 | 1,1,1       | 3/2,2,5/2   | 2/3,1,2     | 1/2,1,3/2 | 1,1,1       | 2/3,1,2     |
|   | E2 | 1,1,1       | 1/2,1,3/2   | 2/3,1,2     | 2/3,1,2   | 1/2,1,3/2   | 2/3,1,2     |
|   | E3 | 1,1,1       | 3/2,2,5/2   | 2/3,1,2     | 1/2,1,3/2 | 1,1,1       | 2/3,1,2     |
|   | E4 | 1,1,1       | 1/2,1,3/2   | 2/3,1,2     | 1/2,1,3/2 | 1,1,1       | 2/3,1,2     |
|   | E5 | 1,1,1       | 1/2,1,3/2   | 2/3,1,2     | 1/2,1,3/2 | 1,1,1       | 2/5,1/2,2/3 |
|   | E6 | 1,1,1       | 3/2,2,5/2   | 2/3,1,2     | 1/2,1,3/2 | 1,1,1       | 2/3,1,2     |
|   | E7 | 1,1,1       | 1/2,1,3/2   | 2/3,1,2     | 1/2,1,3/2 | 1,1,1       | 2/3,1,2     |
|   | E8 | 1,1,1       | 2/3,1,2     | 2/5,1/2,2/3 | 2/3,1,2   | 1,1,1       | 2/5,1/2,2/3 |
| S | E1 | 2/5,1/2,2/3 | 1,1,1       | 1,1,1       | 1/2,1,3/2 | 2/3,1,2     | 2/3,1,2     |
|   | E2 | 2/3,1,2     | 1,1,1       | 2/3,1,2     | 1/2,1,3/2 | 2/3,1,2     | 2/5,1/2,2/3 |
|   | E3 | 2/5,1/2,2/3 | 1,1,1       | 1,1,1       | 1/2,1,3/2 | 2/3,1,2     | 2/5,1/2,2/3 |
|   | E4 | 2/3,1,2     | 1,1,1       | 1,1,1       | 1/2,1,3/2 | 2/5,1/2,2/3 | 2/3,1,2     |
|   | E5 | 2/3,1,2     | 1,1,1       | 1,1,1       | 3/2,2,5/2 | 2/5,1/2,2/3 | 2/3,1,2     |
|   | E6 | 2/5,1/2,2/3 | 1,1,1       | 1,1,1       | 1/2,1,3/2 | 2/3,1,2     | 2/3,1,2     |
|   | E7 | 2/3,1,2     | 1,1,1       | 1,1,1       | 1/2,1,3/2 | 2/5,1/2,2/3 | 2/3,1,2     |
|   | E8 | 1/2,1,3/2   | 1,1,1       | 2/5,1/2,2/3 | 1/2,1,3/2 | 3/2,2,5/2   | 2/3,1,2     |
| P | E1 | 1/2,1,3/2   | 1,1,1       | 1,1,1       | 1,1,1     | 1/2,1,3/2   | 1/2,1,3/2   |
|   | E2 | 1/2,1,3/2   | 1/2,1,3/2   | 1,1,1       | 1/2,1,3/2 | 1/2,1,3/2   | 3/2,2,5/2   |
|   | E3 | 1/2,1,3/2   | 1,1,1       | 1,1,1       | 1,1,1     | 3/2,2,5/2   | 1/2,1,3/2   |
|   | E4 | 1/2,1,3/2   | 1,1,1       | 1,1,1       | 2/3,1,2   | 1/2,1,3/2   | 1/2,1,3/2   |
|   | E5 | 1/2,1,3/2   | 1,1,1       | 1,1,1       | 2/3,1,2   | 1/2,1,3/2   | 1/2,1,3/2   |
|   | E6 | 1/2,1,3/2   | 1,1,1       | 1,1,1       | 2/3,1,2   | 1/2,1,3/2   | 1/2,1,3/2   |
|   | E7 | 1/2,1,3/2   | 1,1,1       | 1,1,1       | 1,1,1     | 1/2,1,3/2   | 1/2,1,3/2   |
|   | E8 | 3/2,2,5/2   | 3/2,2,5/2   | 1,1,1       | 5/2,3,7/2 | 5/2,3,7/2   | 3/2,2,5/2   |
| D | E1 | 2/3,1,2     | 2/3,1,2     | 1,1,1       | 1,1,1     | 2/3,1,2     | 2/3,1,2     |
|   | E2 | 1/2,1,3/2   | 2/3,1,2     | 2/3,1,2     | 1,1,1     | 2/3,1,2     | 2/5,1/2,2/3 |
|   | E3 | 2/3,1,2     | 2/3,1,2     | 1,1,1       | 1,1,1     | 2/5,1/2,2/3 | 2/3,1,2     |
|   | E4 | 2/3,1,2     | 2/3,1,2     | 1/2,1,3/2   | 1,1,1     | 2/3,1,2     | 2/3,1,2     |
|   | E5 | 2/3,1,2     | 2/5,1/2,2/3 | 1/2,1,3/2   | 1,1,1     | 2/3,1,2     | 2/3,1,2     |
|   | E6 | 2/3,1,2     | 2/3,1,2     | 1/2,1,3/2   | 1,1,1     | 2/3,1,2     | 2/3,1,2     |
|   | E7 | 2/3,1,2     | 2/3,1,2     | 1,1,1       | 1,1,1     | 2/3,1,2     | 2/3,1,2     |
|   | E8 | 1/2,1,3/2   | 2/3,1,2     | 2/7,1/3,2/5 | 1,1,1     | 1,1,1       | 2/3,1,2     |
| F | E1 | 1,1,1       | 1/2,1,3/2   | 2/3,1,2     | 1/2,1,3/2 | 1,1,1       | 1/2,1,3/2   |
|   | E2 | 2/3,1,2     | 1/2,1,3/2   | 2/3,1,2     | 1/2,1,3/2 | 1,1,1       | 1/2,1,3/2   |
|   | E3 | 1,1,1       | 1/2,1,3/2   | 2/5,1/2,2/3 | 3/2,2,5/2 | 1,1,1       | 1/2,1,3/2   |
|   | E4 | 1,1,1       | 3/2,2,5/2   | 2/3,1,2     | 1/2,1,3/2 | 1,1,1       | 1/2,1,3/2   |
|   | E5 | 1,1,1       | 3/2,2,5/2   | 2/3,1,2     | 1/2,1,3/2 | 1,1,1       | 3/2,2,5/2   |
|   | E6 | 1,1,1       | 1/2,1,3/2   | 2/3,1,2     | 1/2,1,3/2 | 1,1,1       | 3/2,2,5/2   |
|   | E7 | 1,1,1       | 3/2,2,5/2   | 2/3,1,2     | 1/2,1,3/2 | 1,1,1       | 1/2,1,3/2   |
|   | E8 | 1,1,1       | 2/5,1/2,2/3 | 2/7,1/3,2/5 | 1,1,1     | 1,1,1       | 2/3,1,2     |
| G | E1 | 1/2,1,3/2   | 1/2,1,3/2   | 2/3,1,2     | 1/2,1,3/2 | 2/3,1,2     | 1,1,1       |
|   | E2 | 1/2,1,3/2   | 3/2,2,5/2   | 2/5,1/2,2/3 | 3/2,2,5/2 | 2/3,1,2     | 1,1,1       |
|   | E3 | 1/2,1,3/2   | 3/2,2,5/2   | 2/3,1,2     | 1/2,1,3/2 | 2/3,1,2     | 1,1,1       |
|   | E4 | 1/2,1,3/2   | 1/2,1,3/2   | 2/3,1,2     | 1/2,1,3/2 | 2/3,1,2     | 1,1,1       |
|   | E5 | 3/2,2,5/2   | 1/2,1,3/2   | 2/3,1,2     | 1/2,1,3/2 | 2/5,1/2,2/3 | 1,1,1       |
|   | E6 | 1/2,1,3/2   | 1/2,1,3/2   | 2/3,1,2     | 1/2,1,3/2 | 2/5,1/2,2/3 | 1,1,1       |
|   | E7 | 1/2,1,3/2   | 1/2,1,3/2   | 2/3,1,2     | 1/2,1,3/2 | 2/3,1,2     | 1,1,1       |
|   | E8 | 3/2,2,5/2   | 1/2,1,3/2   | 2/5,1/2,2/3 | 1/2,1,3/2 | 1/2,1,3/2   | 1,1,1       |

|    |    | C1          | C2          | C3          | C5          | C6          | C7          | C9          |
|----|----|-------------|-------------|-------------|-------------|-------------|-------------|-------------|
| C1 | E1 | 1,1,1       | 2/3,1,2     | 2/3,1,2     | 1/2,1,3/2   | 1/2,1,3/2   | 1/2,1,3/2   | 1/2,1,3/2   |
|    | E2 | 1,1,1       | 2/5,1/2,2/3 | 2/3,1,2     | 1/2,1,3/2   | 3/2,2,5/2   | 1/2,1,3/2   | 2/3,1,2     |
|    | E3 | 1,1,1       | 2/3,1,2     | 2/3,1,2     | 3/2,2,5/2   | 1/2,1,3/2   | 3/2,2,5/2   | 1/2,1,3/2   |
|    | E4 | 1,1,1       | 2/3,1,2     | 2/3,1,2     | 1/2,1,3/2   | 3/2,2,5/2   | 1/2,1,3/2   | 1/2,1,3/2   |
|    | E5 | 1,1,1       | 2/3,1,2     | 3/2,2,5/2   | 2/3,1,2     | 1/2,1,3/2   | 1/2,1,3/2   | 1/2,1,3/2   |
|    | E6 | 1,1,1       | 2/3,1,2     | 1/2,1,3/2   | 2/5,1/2,2/3 | 1/2,1,3/2   | 3/2,2,5/2   | 1/2,1,3/2   |
|    | E7 | 1,1,1       | 2/3,1,2     | 3/2,2,5/2   | 2/5,1/2,2/3 | 1,1,1       | 1/2,1,3/2   | 1/2,1,3/2   |
|    | E8 | 1,1,1       | 1,1,1       | 2/3,1,2     | 1/2,1,3/2   | 1/2,1,3/2   | 1/2,1,3/2   | 2/3,1,2     |
| C2 | E1 | 1/2,1,3/2   | 1,1,1       | 1,1,1       | 2/3,1,2     | 1,1,1       | 3/2,2,5/2   | 1/2,1,3/2   |
|    | E2 | 3/2,2,5/2   | 1,1,1       | 1/2,1,3/2   | 1/2,1,3/2   | 1/2,1,3/2   | 1/2,1,3/2   | 2/3,1,2     |
|    | E3 | 1/2,1,3/2   | 1,1,1       | 2/3,1,2     | 2/5,1/2,2/3 | 1/2,1,3/2   | 1/2,1,3/2   | 1/2,1,3/2   |
|    | E4 | 1/2,1,3/2   | 1,1,1       | 1/2,1,3/2   | 1/2,1,3/2   | 1/2,1,3/2   | 1/2,1,3/2   | 3/2,2,5/2   |
|    | E5 | 1/2,1,3/2   | 1,1,1       | 1,1,1       | 1/2,1,3/2   | 2/3,1,2     | 1/2,1,3/2   | 1/2,1,3/2   |
|    | E6 | 1/2,1,3/2   | 1,1,1       | 2/3,1,2     | 1/2,1,3/2   | 1/2,1,3/2   | 2/3,1,2     | 1/2,1,3/2   |
|    | E7 | 1/2,1,3/2   | 1,1,1       | 1,1,1       | 1/2,1,3/2   | 2/3,1,2     | 2/3,1,2     | 1/2,1,3/2   |
|    | E8 | 1,1,1       | 1,1,1       | 3/2,2,5/2   | 3/2,2,5/2   | 1/2,1,3/2   | 1/2,1,3/2   | 1,1,1       |
| C3 | E1 | 1/2,1,3/2   | 1,1,1       | 1,1,1       | 2/3,1,2     | 1,1,1       | 1/2,1,3/2   | 1/2,1,3/2   |
|    | E2 | 1/2,1,3/2   | 2/3,1,2     | 1,1,1       | 2/3,1,2     | 1,1,1       | 1/2,1,3/2   | 2/3,1,2     |
|    | E3 | 1/2,1,3/2   | 1/2,1,3/2   | 1,1,1       | 2/3,1,2     | 1/2,1,3/2   | 1/2,1,3/2   | 1/2,1,3/2   |
|    | E4 | 1/2,1,3/2   | 2/3,1,2     | 1,1,1       | 2/3,1,2     | 1/2,1,3/2   | 1/2,1,3/2   | 2/3,1,2     |
|    | E5 | 2/5,1/2,2/3 | 1,1,1       | 1,1,1       | 2/3,1,2     | 1/2,1,3/2   | 2/3,1,2     | 1/2,1,3/2   |
|    | E6 | 2/3,1,2     | 1/2,1,3/2   | 1,1,1       | 1/2,1,3/2   | 1/2,1,3/2   | 2/3,1,2     | 1/2,1,3/2   |
|    | E7 | 2/5,1/2,2/3 | 1,1,1       | 1,1,1       | 2/3,1,2     | 1/2,1,3/2   | 2/3,1,2     | 1/2,1,3/2   |
|    | E8 | 1/2,1,3/2   | 2/5,1/2,2/3 | 1,1,1       | 7/2,4,9/2   | 1/2,1,3/2   | 1/2,1,3/2   | 1,1,1       |
| C5 | E1 | 2/3,1,2     | 1/2,1,3/2   | 1/2,1,3/2   | 1,1,1       | 1,1,1       | 3/2,2,5/2   | 1,1,1       |
|    | E2 | 2/3,1,2     | 2/3,1,2     | 1/2,1,3/2   | 1,1,1       | 1/2,1,3/2   | 1/2,1,3/2   | 1/2,1,3/2   |
|    | E3 | 2/5,1/2,2/3 | 3/2,2,5/2   | 1/2,1,3/2   | 1,1,1       | 2/3,1,2     | 1/2,1,3/2   | 2/3,1,2     |
|    | E4 | 2/3,1,2     | 2/3,1,2     | 1/2,1,3/2   | 1,1,1       | 1/2,1,3/2   | 1/2,1,3/2   | 1/2,1,3/2   |
|    | E5 | 1/2,1,3/2   | 2/3,1,2     | 1/2,1,3/2   | 1,1,1       | 2/3,1,2     | 2/3,1,2     | 1/2,1,3/2   |
|    | E6 | 3/2,2,5/2   | 2/3,1,2     | 2/3,1,2     | 1,1,1       | 2/3,1,2     | 1/2,1,3/2   | 2/3,1,2     |
|    | E7 | 3/2,2,5/2   | 2/3,1,2     | 1/2,1,3/2   | 1,1,1       | 2/3,1,2     | 2/3,1,2     | 3/2,2,5/2   |
|    | E8 | 2/3,1,2     | 2/5,1/2,2/3 | 2/9,1/4,2/7 | 1,1,1       | 1,1,1       | 2/3,1,2     | 2/7,1/3,2/5 |
| C6 | E1 | 2/3,1,2     | 1,1,1       | 1,1,1       | 1,1,1       | 1,1,1       | 1/2,1,3/2   | 1/2,1,3/2   |
|    | E2 | 2/5,1/2,2/3 | 2/3,1,2     | 1,1,1       | 2/3,1,2     | 1,1,1       | 1/2,1,3/2   | 1/2,1,3/2   |
|    | E3 | 2/3,1,2     | 2/3,1,2     | 2/3,1,2     | 1/2,1,3/2   | 1,1,1       | 1/2,1,3/2   | 1/2,1,3/2   |
|    | E4 | 2/5,1/2,2/3 | 2/3,1,2     | 2/3,1,2     | 2/3,1,2     | 1,1,1       | 3/2,2,5/2   | 1/2,1,3/2   |
|    | E5 | 2/3,1,2     | 1/2,1,3/2   | 2/3,1,2     | 1/2,1,3/2   | 1,1,1       | 3/2,2,5/2   | 1/2,1,3/2   |
|    | E6 | 2/3,1,2     | 2/3,1,2     | 2/3,1,2     | 1/2,1,3/2   | 1,1,1       | 2/3,1,2     | 1/2,1,3/2   |
|    | E7 | 1,1,1       | 1/2,1,3/2   | 2/3,1,2     | 1/2,1,3/2   | 1,1,1       | 3/2,2,5/2   | 1/2,1,3/2   |
|    | E8 | 2/3,1,2     | 2/3,1,2     | 2/3,1,2     | 1,1,1       | 1,1,1       | 2/3,1,2     | 2/7,1/3,2/5 |
| C7 | E1 | 2/3,1,2     | 2/5,1/2,2/3 | 2/3,1,2     | 2/5,1/2,2/3 | 2/3,1,2     | 1,1,1       | 2/3,1,2     |
|    | E2 | 2/3,1,2     | 2/3,1,2     | 2/3,1,2     | 2/3,1,2     | 2/3,1,2     | 1,1,1       | 3/2,2,5/2   |
|    | E3 | 2/5,1/2,2/3 | 2/3,1,2     | 2/3,1,2     | 2/3,1,2     | 2/3,1,2     | 1,1,1       | 2/3,1,2     |
|    | E4 | 2/3,1,2     | 2/3,1,2     | 2/3,1,2     | 2/3,1,2     | 2/5,1/2,2/3 | 1,1,1       | 1/2,1,3/2   |
|    | E5 | 2/3,1,2     | 2/3,1,2     | 1/2,1,3/2   | 1/2,1,3/2   | 2/5,1/2,2/3 | 1,1,1       | 2/7,1/3,2/5 |
|    | E6 | 2/5,1/2,2/3 | 1/2,1,3/2   | 1/2,1,3/2   | 2/3,1,2     | 1/2,1,3/2   | 1,1,1       | 1/2,1,3/2   |
|    | E7 | 2/3,1,2     | 1/2,1,3/2   | 1/2,1,3/2   | 1/2,1,3/2   | 2/5,1/2,2/3 | 1,1,1       | 3/2,2,5/2   |
|    | E8 | 2/3,1,2     | 2/3,1,2     | 2/3,1,2     | 1/2,1,3/2   | 1/2,1,3/2   | 1,1,1       | 2/7,1/3,2/5 |
| C9 | E1 | 2/3,1,2     | 2/3,1,2     | 2/3,1,2     | 1,1,1       | 2/3,1,2     | 1/2,1,3/2   | 1,1,1       |
|    | E2 | 1/2,1,3/2   | 1/2,1,3/2   | 1/2,1,3/2   | 2/3,1,2     | 2/3,1,2     | 2/5,1/2,2/3 | 1,1,1       |
|    | E3 | 2/3,1,2     | 2/3,1,2     | 2/3,1,2     | 1/2,1,3/2   | 2/3,1,2     | 1/2,1,3/2   | 1,1,1       |
|    | E4 | 2/3,1,2     | 2/5,1/2,2/3 | 1/2,1,3/2   | 2/3,1,2     | 2/3,1,2     | 2/3,1,2     | 1,1,1       |
|    | E5 | 2/3,1,2     | 2/3,1,2     | 2/3,1,2     | 2/3,1,2     | 2/3,1,2     | 5/2,3,7/2   | 1,1,1       |
|    | E6 | 2/3,1,2     | 2/3,1,2     | 2/3,1,2     | 1/2,1,3/2   | 2/3,1,2     | 2/3,1,2     | 1,1,1       |
|    | E7 | 2/3,1,2     | 2/3,1,2     | 2/3,1,2     | 2/5,1/2,2/3 | 2/3,1,2     | 2/5,1/2,2/3 | 1,1,1       |
|    | E8 | 1/2,1,3/2   | 1,1,1       | 1,1,1       | 5/2,3,7/2   | 5/2,3,7/2   | 5/2,3,7/2   | 1,1,1       |

|    |    | S1          | S2          | S3          | S4        | S5          |
|----|----|-------------|-------------|-------------|-----------|-------------|
| S1 | E1 | 1,1,1       | 2/3,1,2     | 1/2,1,3/2   | 1/2,1,3/2 | 1/2,1,3/2   |
|    | E2 | 1,1,1       | 1,1,1       | 3/2,2,5/2   | 1/2,1,3/2 | 1/2,1,3/2   |
|    | E3 | 1,1,1       | 2/3,1,2     | 5/2,3,7/2   | 1/2,1,3/2 | 1/2,1,3/2   |
|    | E4 | 1,1,1       | 2/5,1/2,2/3 | 5/2,3,7/2   | 3/2,2,5/2 | 1/2,1,3/2   |
|    | E5 | 1,1,1       | 1,1,1       | 1/2,1,3/2   | 3/2,2,5/2 | 1/2,1,3/2   |
|    | E6 | 1,1,1       | 2/3,1,2     | 5/2,3,7/2   | 1/2,1,3/2 | 1/2,1,3/2   |
|    | E7 | 1,1,1       | 1,1,1       | 5/2,3,7/2   | 3/2,2,5/2 | 3/2,2,5/2   |
|    | E8 | 1,1,1       | 2/5,1/2,2/3 | 2/7,1/3,2/5 | 1/2,1,3/2 | 3/2,2,5/2   |
| S2 | E1 | 1/2,1,3/2   | 1,1,1       | 1/2,1,3/2   | 3/2,2,5/2 | 1/2,1,3/2   |
|    | E2 | 1,1,1       | 1,1,1       | 3/2,2,5/2   | 3/2,2,5/2 | 1/2,1,3/2   |
|    | E3 | 1/2,1,3/2   | 1,1,1       | 3/2,2,5/2   | 1/2,1,3/2 | 1/2,1,3/2   |
|    | E4 | 3/2,2,5/2   | 1,1,1       | 3/2,2,5/2   | 1/2,1,3/2 | 3/2,2,5/2   |
|    | E5 | 1,1,1       | 1,1,1       | 3/2,2,5/2   | 3/2,2,5/2 | 3/2,2,5/2   |
|    | E6 | 1/2,1,3/2   | 1,1,1       | 3/2,2,5/2   | 1/2,1,3/2 | 1/2,1,3/2   |
|    | E7 | 1,1,1       | 1,1,1       | 3/2,2,5/2   | 1/2,1,3/2 | 1/2,1,3/2   |
|    | E8 | 3/2,2,5/2   | 1,1,1       | 5/2,3,7/2   | 5/2,3,7/2 | 5/2,3,7/2   |
| S3 | E1 | 2/3,1,2     | 2/3,1,2     | 1,1,1       | 1/2,1,3/2 | 1/2,1,3/2   |
|    | E2 | 2/5,1/2,2/3 | 2/5,1/2,2/3 | 1,1,1       | 3/2,2,5/2 | 1/2,1,3/2   |
|    | E3 | 2/7,1/3,2/5 | 2/5,1/2,2/3 | 1,1,1       | 1/2,1,3/2 | 1/2,1,3/2   |
|    | E4 | 2/7,1/3,2/5 | 2/5,1/2,2/3 | 1,1,1       | 1/2,1,3/2 | 3/2,2,5/2   |
|    | E5 | 2/3,1,2     | 2/5,1/2,2/3 | 1,1,1       | 1/2,1,3/2 | 1/2,1,3/2   |
|    | E6 | 2/7,1/3,2/5 | 2/5,1/2,2/3 | 1,1,1       | 3/2,2,5/2 | 1/2,1,3/2   |
|    | E7 | 2/7,1/3,2/5 | 2/5,1/2,2/3 | 1,1,1       | 1/2,1,3/2 | 1/2,1,3/2   |
|    | E8 | 5/2,3,7/2   | 2/7,1/3,2/5 | 1,1,1       | 7/2,4,9/2 | 7/2,4,9/2   |
| S4 | E1 | 2/3,1,2     | 2/5,1/2,2/3 | 2/3,1,2     | 1,1,1     | 2/3,1,2     |
|    | E2 | 2/3,1,2     | 2/5,1/2,2/3 | 2/5,1/2,2/3 | 1,1,1     | 2/5,1/2,2/3 |
|    | E3 | 2/3,1,2     | 2/3,1,2     | 2/3,1,2     | 1,1,1     | 2/7,1/3,2/5 |
|    | E4 | 2/5,1/2,2/3 | 2/3,1,2     | 2/3,1,2     | 1,1,1     | 2/5,1/2,2/3 |
|    | E5 | 2/5,1/2,2/3 | 2/5,1/2,2/3 | 2/3,1,2     | 1,1,1     | 2/5,1/2,2/3 |
|    | E6 | 2/3,1,2     | 2/3,1,2     | 2/5,1/2,2/3 | 1,1,1     | 2/7,1/3,2/5 |
|    | E7 | 2/5,1/2,2/3 | 2/3,1,2     | 2/3,1,2     | 1,1,1     | 2/9,1/4,2/7 |
|    | E8 | 2/3,1,2     | 2/7,1/3,2/5 | 2/9,1/4,2/7 | 1,1,1     | 2/3,1,2     |
| S5 | E1 | 2/3,1,2     | 2/3,1,2     | 2/3,1,2     | 1/2,1,3/2 | 1,1,1       |
|    | E2 | 2/3,1,2     | 2/3,1,2     | 2/3,1,2     | 3/2,2,5/2 | 1,1,1       |
|    | E3 | 2/3,1,2     | 2/3,1,2     | 2/3,1,2     | 5/2,3,7/2 | 1,1,1       |
|    | E4 | 2/3,1,2     | 2/5,1/2,2/3 | 2/5,1/2,2/3 | 3/2,2,5/2 | 1,1,1       |
|    | E5 | 2/3,1,2     | 2/5,1/2,2/3 | 2/3,1,2     | 3/2,2,5/2 | 1,1,1       |
|    | E6 | 2/3,1,2     | 2/3,1,2     | 2/3,1,2     | 5/2,3,7/2 | 1,1,1       |
|    | E7 | 2/5,1/2,2/3 | 2/3,1,2     | 2/3,1,2     | 7/2,4,9/2 | 1,1,1       |
|    | E8 | 2/5,1/2,2/3 | 2/7,1/3,2/5 | 2/9,1/4,2/7 | 1/2,1,3/2 | 1,1,1       |

|    |    | P1          | P2          | P3          | P4          |
|----|----|-------------|-------------|-------------|-------------|
| P1 | E1 | 1,1,1       | 1/2,1,3/2   | 2/3,1,2     | 2/3,1,2     |
|    | E2 | 1,1,1       | 3/2,2,5/2   | 3/2,2,5/2   | 1,1,1       |
|    | E3 | 1,1,1       | 2/3,1,2     | 1,1,1       | 2/3,1,2     |
|    | E4 | 1,1,1       | 1,1,1       | 2/5,1/2,2/3 | 2/3,1,2     |
|    | E5 | 1,1,1       | 2/5,1/2,2/3 | 1/2,1,3/2   | 2/3,1,2     |
|    | E6 | 1,1,1       | 3/2,2,5/2   | 2/3,1,2     | 2/5,1/2,2/3 |
|    | E7 | 1,1,1       | 2/5,1/2,2/3 | 2/3,1,2     | 2/3,1,2     |
|    | E8 | 1,1,1       | 3/2,2,5/2   | 2/7,1/3,2/5 | 2/7,1/3,2/5 |
| P2 | E1 | 2/3,1,2     | 1,1,1       | 2/3,1,2     | 2/5,1/2,2/3 |
|    | E2 | 2/5,1/2,2/3 | 1,1,1       | 2/3,1,2     | 2/5,1/2,2/3 |
|    | E3 | 1/2,1,3/2   | 1,1,1       | 1/2,1,3/2   | 3/2,2,5/2   |
|    | E4 | 1,1,1       | 1,1,1       | 2/3,1,2     | 2/3,1,2     |
|    | E5 | 3/2,2,5/2   | 1,1,1       | 1/2,1,3/2   | 1,1,1       |
|    | E6 | 2/5,1/2,2/3 | 1,1,1       | 2/3,1,2     | 2/3,1,2     |
|    | E7 | 3/2,2,5/2   | 1,1,1       | 2/3,1,2     | 3/2,2,5/2   |
|    | E8 | 2/5,1/2,2/3 | 1,1,1       | 2/7,1/3,2/5 | 2/5,1/2,2/3 |
| P3 | E1 | 1/2,1,3/2   | 1/2,1,3/2   | 1,1,1       | 2/3,1,2     |
|    | E2 | 2/5,1/2,2/3 | 1/2,1,3/2   | 1,1,1       | 2/5,1/2,2/3 |
|    | E3 | 1,1,1       | 2/3,1,2     | 1,1,1       | 1/2,1,3/2   |
|    | E4 | 3/2,2,5/2   | 1/2,1,3/2   | 1,1,1       | 3/2,2,5/2   |
|    | E5 | 2/3,1,2     | 2/3,1,2     | 1,1,1       | 2/3,1,2     |
|    | E6 | 1/2,1,3/2   | 1/2,1,3/2   | 1,1,1       | 2/3,1,2     |
|    | E7 | 1/2,1,3/2   | 1/2,1,3/2   | 1,1,1       | 1/2,1,3/2   |
|    | E8 | 5/2,3,7/2   | 5/2,3,7/2   | 1,1,1       | 1/2,1,3/2   |
| P4 | E1 | 1/2,1,3/2   | 3/2,2,5/2   | 1/2,1,3/2   | 1,1,1       |
|    | E2 | 1,1,1       | 3/2,2,5/2   | 3/2,2,5/2   | 1,1,1       |
|    | E3 | 1/2,1,3/2   | 2/5,1/2,2/3 | 2/3,1,2     | 1,1,1       |
|    | E4 | 1/2,1,3/2   | 1/2,1,3/2   | 2/5,1/2,2/3 | 1,1,1       |
|    | E5 | 1/2,1,3/2   | 1,1,1       | 1/2,1,3/2   | 1,1,1       |
|    | E6 | 3/2,2,5/2   | 1/2,1,3/2   | 1/2,1,3/2   | 1,1,1       |
|    | E7 | 1/2,1,3/2   | 2/5,1/2,2/3 | 2/3,1,2     | 1,1,1       |
|    | E8 | 5/2,3,7/2   | 3/2,2,5/2   | 2/3,1,2     | 1,1,1       |

|    |    | D1        | D2          | D3          | D4        | D5          | D8        |
|----|----|-----------|-------------|-------------|-----------|-------------|-----------|
| D1 | E1 | 1,1,1     | 2/3,1,2     | 2/3,1,2     | 1,1,1     | 2/5,1/2,2/3 | 1,1,1     |
|    | E2 | 1,1,1     | 2/3,1,2     | 2/3,1,2     | 2/3,1,2   | 2/3,1,2     | 1,1,1     |
|    | E3 | 1,1,1     | 2/3,1,2     | 2/5,1/2,2/3 | 2/3,1,2   | 2/3,1,2     | 1,1,1     |
|    | E4 | 1,1,1     | 1/2,1,3/2   | 2/3,1,2     | 1/2,1,3/2 | 2/3,1,2     | 1,1,1     |
|    | E5 | 1,1,1     | 1/2,1,3/2   | 2/3,1,2     | 1/2,1,3/2 | 1/2,1,3/2   | 1/2,1,3/2 |
|    | E6 | 1,1,1     | 1/2,1,3/2   | 2/3,1,2     | 1/2,1,3/2 | 2/3,1,2     | 1,1,1     |
|    | E7 | 1,1,1     | 2/3,1,2     | 2/3,1,2     | 1,1,1     | 2/3,1,2     | 1,1,1     |
|    | E8 | 1,1,1     | 2/3,1,2     | 2/3,1,2     | 1,1,1     | 2/3,1,2     | 1,1,1     |
| D2 | E1 | 1/2,1,3/2 | 1,1,1       | 1/2,1,3/2   | 3/2,2,5/2 | 1/2,1,3/2   | 1,1,1     |
|    | E2 | 1/2,1,3/2 | 1,1,1       | 1/2,1,3/2   | 1/2,1,3/2 | 1/2,1,3/2   | 1,1,1     |
|    | E3 | 1/2,1,3/2 | 1,1,1       | 1/2,1,3/2   | 1/2,1,3/2 | 1/2,1,3/2   | 2/3,1,2   |
|    | E4 | 2/3,1,2   | 1,1,1       | 2/3,1,2     | 1/2,1,3/2 | 1/2,1,3/2   | 1,1,1     |
|    | E5 | 2/3,1,2   | 1,1,1       | 2/3,1,2     | 1/2,1,3/2 | 1/2,1,3/2   | 1/2,1,3/2 |
|    | E6 | 2/3,1,2   | 1,1,1       | 2/3,1,2     | 1/2,1,3/2 | 2/3,1,2     | 1,1,1     |
|    | E7 | 1/2,1,3/2 | 1,1,1       | 1/2,1,3/2   | 1/2,1,3/2 | 1,1,1       | 1,1,1     |
|    | E8 | 1/2,1,3/2 | 1,1,1       | 1/2,1,3/2   | 1/2,1,3/2 | 1/2,1,3/2   | 1,1,1     |
| D3 | E1 | 1/2,1,3/2 | 2/3,1,2     | 1,1,1       | 1,1,1     | 2/3,1,2     | 1,1,1     |
|    | E2 | 1/2,1,3/2 | 2/3,1,2     | 1,1,1       | 1,1,1     | 2/3,1,2     | 1,1,1     |
|    | E3 | 3/2,2,5/2 | 2/3,1,2     | 1,1,1       | 1,1,1     | 2/3,1,2     | 1,1,1     |
|    | E4 | 1/2,1,3/2 | 1/2,1,3/2   | 1,1,1       | 1,1,1     | 2/3,1,2     | 1,1,1     |
|    | E5 | 1/2,1,3/2 | 1/2,1,3/2   | 1,1,1       | 1,1,1     | 2/3,1,2     | 1,1,1     |
|    | E6 | 1/2,1,3/2 | 1/2,1,3/2   | 1,1,1       | 1,1,1     | 1,1,1       | 1,1,1     |
|    | E7 | 1/2,1,3/2 | 2/3,1,2     | 1,1,1       | 1,1,1     | 2/3,1,2     | 1,1,1     |
|    | E8 | 1/2,1,3/2 | 2/3,1,2     | 1,1,1       | 1,1,1     | 2/3,1,2     | 1,1,1     |
| D4 | E1 | 1,1,1     | 2/5,1/2,2/3 | 1,1,1       | 1,1,1     | 1,1,1       | 1,1,1     |
|    | E2 | 1/2,1,3/2 | 2/3,1,2     | 1,1,1       | 1,1,1     | 1,1,1       | 1,1,1     |
|    | E3 | 1/2,1,3/2 | 2/3,1,2     | 1,1,1       | 1,1,1     | 1,1,1       | 1/2,1,3/2 |
|    | E4 | 2/3,1,2   | 2/3,1,2     | 1,1,1       | 1,1,1     | 1,1,1       | 1/2,1,3/2 |
|    | E5 | 2/3,1,2   | 2/3,1,2     | 1,1,1       | 1,1,1     | 1,1,1       | 1/2,1,3/2 |
|    | E6 | 2/3,1,2   | 2/3,1,2     | 1,1,1       | 1,1,1     | 1/2,1,3/2   | 1/2,1,3/2 |
|    | E7 | 1,1,1     | 2/3,1,2     | 1,1,1       | 1,1,1     | 1,1,1       | 1,1,1     |
|    | E8 | 1,1,1     | 2/3,1,2     | 1,1,1       | 1,1,1     | 1,1,1       | 1,1,1     |
| D5 | E1 | 3/2,2,5/2 | 2/3,1,2     | 1/2,1,3/2   | 1,1,1     | 1,1,1       | 1/2,1,3/2 |
|    | E2 | 1/2,1,3/2 | 2/3,1,2     | 1/2,1,3/2   | 1,1,1     | 1,1,1       | 1/2,1,3/2 |
|    | E3 | 1/2,1,3/2 | 2/3,1,2     | 1/2,1,3/2   | 1,1,1     | 1,1,1       | 1,1,1     |
|    | E4 | 1/2,1,3/2 | 2/3,1,2     | 1/2,1,3/2   | 1,1,1     | 1,1,1       | 1/2,1,3/2 |
|    | E5 | 2/3,1,2   | 2/3,1,2     | 1/2,1,3/2   | 1,1,1     | 1,1,1       | 1/2,1,3/2 |
|    | E6 | 1/2,1,3/2 | 1/2,1,3/2   | 1,1,1       | 2/3,1,2   | 1,1,1       | 5/2,3,7/2 |
|    | E7 | 1/2,1,3/2 | 1,1,1       | 1/2,1,3/2   | 1,1,1     | 1,1,1       | 5/2,3,7/2 |
|    | E8 | 1/2,1,3/2 | 2/3,1,2     | 1/2,1,3/2   | 1,1,1     | 1,1,1       | 1,1,1     |
| D8 | E1 | 1,1,1     | 1,1,1       | 1,1,1       | 1,1,1     | 2/3,1,2     | 1,1,1     |
|    | E2 | 1,1,1     | 1,1,1       | 1,1,1       | 1,1,1     | 2/3,1,2     | 1,1,1     |
|    | E3 | 1,1,1     | 1/2,1,3/2   | 1,1,1       | 2/3,1,2   | 1,1,1       | 1,1,1     |
|    | E4 | 1,1,1     | 1,1,1       | 1,1,1       | 2/3,1,2   | 2/3,1,2     | 1,1,1     |
|    | E5 | 2/3,1,2   | 2/3,1,2     | 1,1,1       | 2/3,1,2   | 2/3,1,2     | 1,1,1     |
|    | E6 | 1,1,1     | 1,1,1       | 1,1,1       | 2/3,1,2   | 2/7,1/3,2/5 | 1,1,1     |
|    | E7 | 1,1,1     | 1,1,1       | 1,1,1       | 1,1,1     | 2/7,1/3,2/5 | 1,1,1     |
|    | E8 | 1,1,1     | 1,1,1       | 1,1,1       | 1,1,1     | 1,1,1       | 1,1,1     |

|    |    | F1          | F2          | F3        | F5          | F6          | F7          | F8          |
|----|----|-------------|-------------|-----------|-------------|-------------|-------------|-------------|
| F1 | E1 | 1,1,1       | 2/3,1,2     | 1/2,1,3/2 | 2/3,1,2     | 1/2,1,3/2   | 2/3,1,2     | 2/3,1,2     |
|    | E2 | 1,1,1       | 2/3,1,2     | 2/3,1,2   | 3/2,2,5/2   | 1/2,1,3/2   | 3/2,2,5/2   | 1/2,1,3/2   |
|    | E3 | 1,1,1       | 2/3,1,2     | 1/2,1,3/2 | 2/5,1/2,2/3 | 1/2,1,3/2   | 3/2,2,5/2   | 1/2,1,3/2   |
|    | E4 | 1,1,1       | 2/5,1/2,2/3 | 2/3,1,2   | 2/3,1,2     | 1/2,1,3/2   | 2/5,1/2,2/3 | 2/3,1,2     |
|    | E5 | 1,1,1       | 2/3,1,2     | 3/2,2,5/2 | 2/3,1,2     | 1/2,1,3/2   | 1/2,1,3/2   | 1/2,1,3/2   |
|    | E6 | 1,1,1       | 2/3,1,2     | 1/2,1,3/2 | 2/5,1/2,2/3 | 1/2,1,3/2   | 3/2,2,5/2   | 1/2,1,3/2   |
|    | E7 | 1,1,1       | 2/5,1/2,2/3 | 2/3,1,2   | 2/3,1,2     | 1/2,1,3/2   | 2/5,1/2,2/3 | 2/3,1,2     |
|    | E8 | 1,1,1       | 2/3,1,2     | 1/2,1,3/2 | 2/5,1/2,2/3 | 2/5,1/2,2/3 | 1,1,1       | 1,1,1       |
| F2 | E1 | 1/2,1,3/2   | 1,1,1       | 1/2,1,3/2 | 1/2,1,3/2   | 2/3,1,2     | 2/5,1/2,2/3 | 2/5,1/2,2/3 |
|    | E2 | 1/2,1,3/2   | 1,1,1       | 2/3,1,2   | 2/5,1/2,2/3 | 1/2,1,3/2   | 1/2,1,3/2   | 1/2,1,3/2   |
|    | E3 | 1/2,1,3/2   | 1,1,1       | 2/3,1,2   | 1/2,1,3/2   | 1/2,1,3/2   | 2/3,1,2     | 1/2,1,3/2   |
|    | E4 | 3/2,2,5/2   | 1,1,1       | 1/2,1,3/2 | 1/2,1,3/2   | 2/3,1,2     | 2/3,1,2     | 2/3,1,2     |
|    | E5 | 1/2,1,3/2   | 1,1,1       | 1/2,1,3/2 | 1,1,1       | 1,1,1       | 2/3,1,2     | 2/3,1,2     |
|    | E6 | 1/2,1,3/2   | 1,1,1       | 2/3,1,2   | 1/2,1,3/2   | 1/2,1,3/2   | 1/2,1,3/2   | 1/2,1,3/2   |
|    | E7 | 3/2,2,5/2   | 1,1,1       | 2/3,1,2   | 1/2,1,3/2   | 2/3,1,2     | 2/3,1,2     | 2/3,1,2     |
|    | E8 | 1/2,1,3/2   | 1,1,1       | 1/2,1,3/2 | 2/5,1/2,2/3 | 2/7,1/3,2/5 | 2/3,1,2     | 1/2,1,3/2   |
| F3 | E1 | 2/3,1,2     | 2/3,1,2     | 1,1,1     | 2/3,1,2     | 2/3,1,2     | 1,1,1       | 1,1,1       |
|    | E2 | 1/2,1,3/2   | 1/2,1,3/2   | 1,1,1     | 2/3,1,2     | 1/2,1,3/2   | 1/2,1,3/2   | 1/2,1,3/2   |
|    | E3 | 2/3,1,2     | 1/2,1,3/2   | 1,1,1     | 1/2,1,3/2   | 1/2,1,3/2   | 2/3,1,2     | 1/2,1,3/2   |
|    | E4 | 1/2,1,3/2   | 2/3,1,2     | 1,1,1     | 2/3,1,2     | 1/2,1,3/2   | 2/3,1,2     | 2/3,1,2     |
|    | E5 | 2/5,1/2,2/3 | 2/3,1,2     | 1,1,1     | 2/3,1,2     | 2/3,1,2     | 2/3,1,2     | 2/3,1,2     |
|    | E6 | 2/3,1,2     | 1/2,1,3/2   | 1,1,1     | 2/3,1,2     | 2/3,1,2     | 1/2,1,3/2   | 1/2,1,3/2   |
|    | E7 | 1/2,1,3/2   | 1/2,1,3/2   | 1,1,1     | 2/3,1,2     | 2/3,1,2     | 2/3,1,2     | 2/3,1,2     |
|    | E8 | 2/3,1,2     | 2/3,1,2     | 1,1,1     | 2/5,1/2,2/3 | 2/5,1/2,2/3 | 2/3,1,2     | 1,1,1       |
| F5 | E1 | 1/2,1,3/2   | 2/3,1,2     | 1/2,1,3/2 | 1,1,1       | 1,1,1       | 1/2,1,3/2   | 1/2,1,3/2   |
|    | E2 | 2/5,1/2,2/3 | 3/2,2,5/2   | 1/2,1,3/2 | 1,1,1       | 2/3,1,2     | 1/2,1,3/2   | 1/2,1,3/2   |
|    | E3 | 3/2,2,5/2   | 2/3,1,2     | 2/3,1,2   | 1,1,1       | 2/3,1,2     | 1/2,1,3/2   | 2/3,1,2     |
|    | E4 | 1/2,1,3/2   | 2/3,1,2     | 1/2,1,3/2 | 1,1,1       | 2/3,1,2     | 1/2,1,3/2   | 1/2,1,3/2   |
|    | E5 | 1/2,1,3/2   | 1,1,1       | 1/2,1,3/2 | 1,1,1       | 1,1,1       | 2/3,1,2     | 2/3,1,2     |
|    | E6 | 3/2,2,5/2   | 2/3,1,2     | 1/2,1,3/2 | 1,1,1       | 1,1,1       | 1/2,1,3/2   | 1/2,1,3/2   |
|    | E7 | 1/2,1,3/2   | 2/3,1,2     | 1/2,1,3/2 | 1,1,1       | 2/3,1,2     | 3/2,2,5/2   | 3/2,2,5/2   |
|    | E8 | 3/2,2,5/2   | 3/2,2,5/2   | 3/2,2,5/2 | 1,1,1       | 1,1,1       | 1/2,1,3/2   | 1/2,1,3/2   |
| F6 | E1 | 2/3,1,2     | 1/2,1,3/2   | 1/2,1,3/2 | 1,1,1       | 1,1,1       | 1/2,1,3/2   | 1/2,1,3/2   |
|    | E2 | 2/3,1,2     | 2/3,1,2     | 2/3,1,2   | 1/2,1,3/2   | 1,1,1       | 1/2,1,3/2   | 1/2,1,3/2   |
|    | E3 | 2/3,1,2     | 2/3,1,2     | 2/3,1,2   | 1/2,1,3/2   | 1,1,1       | 2/3,1,2     | 2/3,1,2     |
|    | E4 | 2/3,1,2     | 1/2,1,3/2   | 2/3,1,2   | 1/2,1,3/2   | 1,1,1       | 1/2,1,3/2   | 1/2,1,3/2   |
|    | E5 | 2/3,1,2     | 1,1,1       | 1/2,1,3/2 | 1,1,1       | 1,1,1       | 3/2,2,5/2   | 1/2,1,3/2   |
|    | E6 | 2/3,1,2     | 2/3,1,2     | 1/2,1,3/2 | 1,1,1       | 1,1,1       | 3/2,2,5/2   | 3/2,2,5/2   |
|    | E7 | 2/3,1,2     | 1/2,1,3/2   | 1/2,1,3/2 | 1/2,1,3/2   | 1,1,1       | 1/2,1,3/2   | 1/2,1,3/2   |
|    | E8 | 3/2,2,5/2   | 5/2,3,7/2   | 3/2,2,5/2 | 1,1,1       | 1,1,1       | 1/2,1,3/2   | 1/2,1,3/2   |
| F7 | E1 | 1/2,1,3/2   | 3/2,2,5/2   | 1,1,1     | 2/3,1,2     | 2/3,1,2     | 1,1,1       | 1,1,1       |
|    | E2 | 2/5,1/2,2/3 | 2/3,1,2     | 2/3,1,2   | 2/3,1,2     | 2/3,1,2     | 1,1,1       | 2/5,1/2,2/3 |
|    | E3 | 2/5,1/2,2/3 | 1/2,1,3/2   | 1/2,1,3/2 | 2/3,1,2     | 1/2,1,3/2   | 1,1,1       | 1/2,1,3/2   |
|    | E4 | 3/2,2,5/2   | 1/2,1,3/2   | 1/2,1,3/2 | 2/3,1,2     | 2/3,1,2     | 1,1,1       | 2/3,1,2     |
|    | E5 | 2/3,1,2     | 1/2,1,3/2   | 1/2,1,3/2 | 1/2,1,3/2   | 2/5,1/2,2/3 | 1,1,1       | 2/5,1/2,2/3 |
|    | E6 | 2/5,1/2,2/3 | 2/3,1,2     | 2/3,1,2   | 2/3,1,2     | 2/5,1/2,2/3 | 1,1,1       | 1/2,1,3/2   |
|    | E7 | 3/2,2,5/2   | 1/2,1,3/2   | 1/2,1,3/2 | 2/5,1/2,2/3 | 2/3,1,2     | 1,1,1       | 2/5,1/2,2/3 |
|    | E8 | 1,1,1       | 1/2,1,3/2   | 1/2,1,3/2 | 2/3,1,2     | 2/3,1,2     | 1,1,1       | 1/2,1,3/2   |
| F8 | E1 | 1/2,1,3/2   | 3/2,2,5/2   | 1,1,1     | 2/3,1,2     | 2/3,1,2     | 1,1,1       | 1,1,1       |
|    | E2 | 2/3,1,2     | 2/3,1,2     | 2/3,1,2   | 2/3,1,2     | 2/3,1,2     | 3/2,2,5/2   | 1,1,1       |
|    | E3 | 2/3,1,2     | 2/3,1,2     | 2/3,1,2   | 1/2,1,3/2   | 1/2,1,3/2   | 2/3,1,2     | 1,1,1       |
|    | E4 | 1/2,1,3/2   | 1/2,1,3/2   | 1/2,1,3/2 | 2/3,1,2     | 2/3,1,2     | 1/2,1,3/2   | 1,1,1       |
|    | E5 | 2/3,1,2     | 1/2,1,3/2   | 1/2,1,3/2 | 1/2,1,3/2   | 2/3,1,2     | 3/2,2,5/2   | 1,1,1       |
|    | E6 | 2/3,1,2     | 2/3,1,2     | 2/3,1,2   | 2/3,1,2     | 2/5,1/2,2/3 | 2/3,1,2     | 1,1,1       |
|    | E7 | 1/2,1,3/2   | 1/2,1,3/2   | 1/2,1,3/2 | 2/5,1/2,2/3 | 2/3,1,2     | 3/2,2,5/2   | 1,1,1       |
|    | E8 | 1,1,1       | 2/3,1,2     | 1,1,1     | 2/3,1,2     | 2/3,1,2     | 2/3,1,2     | 1,1,1       |

|    |    | G1          | G2        | G3        | G4          | G5          | G6          |
|----|----|-------------|-----------|-----------|-------------|-------------|-------------|
| G1 | E1 | 1,1,1       | 1/2,1,3/2 | 1/2,1,3/2 | 2/3,1,2     | 1/2,1,3/2   | 2/3,1,2     |
|    | E2 | 1,1,1       | 1,1,1     | 1,1,1     | 2/3,1,2     | 2/3,1,2     | 3/2,2,5/2   |
|    | E3 | 1,1,1       | 2/3,1,2   | 2/3,1,2   | 2/3,1,2     | 2/3,1,2     | 2/3,1,2     |
|    | E4 | 1,1,1       | 2/3,1,2   | 1/2,1,3/2 | 2/3,1,2     | 2/3,1,2     | 1/2,1,3/2   |
|    | E5 | 1,1,1       | 1/2,1,3/2 | 1/2,1,3/2 | 2/5,1/2,2/3 | 2/3,1,2     | 3/2,2,5/2   |
|    | E6 | 1,1,1       | 1/2,1,3/2 | 1/2,1,3/2 | 2/3,1,2     | 2/5,1/2,2/3 | 5/2,3,7/2   |
|    | E7 | 1,1,1       | 1/2,1,3/2 | 1/2,1,3/2 | 2/3,1,2     | 2/3,1,2     | 2/3,1,2     |
|    | E8 | 1,1,1       | 2/3,1,2   | 2/3,1,2   | 2/5,1/2,2/3 | 2/5,1/2,2/3 | 2/5,1/2,2/3 |
| G2 | E1 | 2/3,1,2     | 1,1,1     | 1,1,1     | 2/3,1,2     | 2/3,1,2     | 2/3,1,2     |
|    | E2 | 1,1,1       | 1,1,1     | 2/3,1,2   | 2/3,1,2     | 2/3,1,2     | 2/5,1/2,2/3 |
|    | E3 | 1/2,1,3/2   | 1,1,1     | 2/3,1,2   | 2/3,1,2     | 2/3,1,2     | 2/3,1,2     |
|    | E4 | 1/2,1,3/2   | 1,1,1     | 2/3,1,2   | 2/3,1,2     | 2/5,1/2,2/3 | 2/3,1,2     |
|    | E5 | 2/3,1,2     | 1,1,1     | 2/3,1,2   | 2/5,1/2,2/3 | 2/3,1,2     | 2/5,1/2,2/3 |
|    | E6 | 2/3,1,2     | 1,1,1     | 2/3,1,2   | 2/3,1,2     | 2/3,1,2     | 2/3,1,2     |
|    | E7 | 2/3,1,2     | 1,1,1     | 2/3,1,2   | 2/3,1,2     | 2/5,1/2,2/3 | 2/3,1,2     |
|    | E8 | 1/2,1,3/2   | 1,1,1     | 2/3,1,2   | 2/5,1/2,2/3 | 2/5,1/2,2/3 | 2/3,1,2     |
| G3 | E1 | 2/3,1,2     | 1,1,1     | 1,1,1     | 2/3,1,2     | 2/3,1,2     | 2/3,1,2     |
|    | E2 | 1,1,1       | 1/2,1,3/2 | 1,1,1     | 2/3,1,2     | 2/5,1/2,2/3 | 2/3,1,2     |
|    | E3 | 1/2,1,3/2   | 1/2,1,3/2 | 1,1,1     | 2/3,1,2     | 2/3,1,2     | 2/3,1,2     |
|    | E4 | 2/3,1,2     | 1/2,1,3/2 | 1,1,1     | 2/3,1,2     | 2/3,1,2     | 2/3,1,2     |
|    | E5 | 2/3,1,2     | 1/2,1,3/2 | 1,1,1     | 2/3,1,2     | 2/5,1/2,2/3 | 2/3,1,2     |
|    | E6 | 2/3,1,2     | 1/2,1,3/2 | 1,1,1     | 2/3,1,2     | 2/5,1/2,2/3 | 2/3,1,2     |
|    | E7 | 2/3,1,2     | 1/2,1,3/2 | 1,1,1     | 2/3,1,2     | 2/3,1,2     | 2/3,1,2     |
|    | E8 | 1/2,1,3/2   | 1/2,1,3/2 | 1,1,1     | 2/3,1,2     | 2/3,1,2     | 2/3,1,2     |
| G4 | E1 | 1/2,1,3/2   | 1/2,1,3/2 | 1/2,1,3/2 | 1,1,1       | 1,1,1       | 1/2,1,3/2   |
|    | E2 | 1/2,1,3/2   | 1/2,1,3/2 | 1/2,1,3/2 | 1,1,1       | 2/5,1/2,2/3 | 1/2,1,3/2   |
|    | E3 | 1/2,1,3/2   | 1/2,1,3/2 | 1/2,1,3/2 | 1,1,1       | 1,1,1       | 2/3,1,2     |
|    | E4 | 1/2,1,3/2   | 1/2,1,3/2 | 1/2,1,3/2 | 1,1,1       | 2/3,1,2     | 3/2,2,5/2   |
|    | E5 | 3/2,2,5/2   | 3/2,2,5/2 | 1/2,1,3/2 | 1,1,1       | 2/3,1,2     | 2/3,1,2     |
|    | E6 | 1/2,1,3/2   | 1/2,1,3/2 | 1/2,1,3/2 | 1,1,1       | 2/3,1,2     | 1/2,1,3/2   |
|    | E7 | 1/2,1,3/2   | 1/2,1,3/2 | 1/2,1,3/2 | 1,1,1       | 2/3,1,2     | 2/3,1,2     |
|    | E8 | 3/2,2,5/2   | 3/2,2,5/2 | 1/2,1,3/2 | 1,1,1       | 2/3,1,2     | 1/2,1,3/2   |
| G5 | E1 | 2/3,1,2     | 1/2,1,3/2 | 1/2,1,3/2 | 1,1,1       | 1,1,1       | 1/2,1,3/2   |
|    | E2 | 1/2,1,3/2   | 1/2,1,3/2 | 3/2,2,5/2 | 3/2,2,5/2   | 1,1,1       | 3/2,2,5/2   |
|    | E3 | 1/2,1,3/2   | 1/2,1,3/2 | 1/2,1,3/2 | 1,1,1       | 1,1,1       | 2/3,1,2     |
|    | E4 | 1/2,1,3/2   | 3/2,2,5/2 | 1/2,1,3/2 | 1/2,1,3/2   | 1,1,1       | 2/3,1,2     |
|    | E5 | 1/2,1,3/2   | 1/2,1,3/2 | 3/2,2,5/2 | 1/2,1,3/2   | 1,1,1       | 2/5,1/2,2/3 |
|    | E6 | 3/2,2,5/2   | 1/2,1,3/2 | 3/2,2,5/2 | 1/2,1,3/2   | 1,1,1       | 1/2,1,3/2   |
|    | E7 | 1/2,1,3/2   | 3/2,2,5/2 | 1/2,1,3/2 | 1/2,1,3/2   | 1,1,1       | 2/3,1,2     |
|    | E8 | 3/2,2,5/2   | 3/2,2,5/2 | 1/2,1,3/2 | 1/2,1,3/2   | 1,1,1       | 2/5,1/2,2/3 |
| G6 | E1 | 1/2,1,3/2   | 1/2,1,3/2 | 1/2,1,3/2 | 2/3,1,2     | 2/3,1,2     | 1,1,1       |
|    | E2 | 2/5,1/2,2/3 | 3/2,2,5/2 | 1/2,1,3/2 | 2/3,1,2     | 2/5,1/2,2/3 | 1,1,1       |
|    | E3 | 1/2,1,3/2   | 1/2,1,3/2 | 1/2,1,3/2 | 1/2,1,3/2   | 1/2,1,3/2   | 1,1,1       |
|    | E4 | 2/3,1,2     | 1/2,1,3/2 | 1/2,1,3/2 | 2/5,1/2,2/3 | 1/2,1,3/2   | 1,1,1       |
|    | E5 | 2/5,1/2,2/3 | 3/2,2,5/2 | 1/2,1,3/2 | 1/2,1,3/2   | 3/2,2,5/2   | 1,1,1       |
|    | E6 | 2/7,1/3,2/5 | 1/2,1,3/2 | 1/2,1,3/2 | 2/3,1,2     | 2/3,1,2     | 1,1,1       |
|    | E7 | 1/2,1,3/2   | 1/2,1,3/2 | 1/2,1,3/2 | 1/2,1,3/2   | 3/2,2,5/2   | 1,1,1       |
|    | E8 | 3/2,2,5/2   | 1/2,1,3/2 | 1/2,1,3/2 | 2/3,1,2     | 1/2,1,3/2   | 1,1,1       |
